# Supplementary material for: Adding complexity to the garnet supergroup: monteneveite, Ca&lt;sub&gt;3&lt;/sub&gt;Sb&lt;sup&gt;5+&lt;/sup&gt;&lt;sub&gt;2&lt;/sub&gt;(Fe&lt;sup&gt;3+&lt;/sup&gt;&lt;sub&gt;2&lt;/sub&gt;Fe&lt;sup&gt;2+&lt;/sup&gt;)O&lt;sub&gt;12&lt;/sub&gt;, a new mineral from the Monteneve mine, Bolzano Province, Italy
Source: Copernicus journal article supplement (doi:10.5194/ejm-32-77-2020), 2020-01-21

# checkCIF/PLATON report

You have not supplied any structure factors. As a result the full set of tests cannot be run.

THIS REPORT IS FOR GUIDANCE ONLY. IF USED AS PART OF A REVIEW PROCEDURE FOR PUBLICATION, IT SHOULD NOT REPLACE THE EXPERTISE OF AN EXPERIENCED CRYSTALLOGRAPHIC REFEREE.

No syntax errors found.      CIF dictionary      Interpreting this report

## Datablock: monteneveite

---

Bond precision:    Fe- O = 0.0014 A                      Wavelength=0.71073

Cell:                      a=12.6093(2)              b=12.6093(2)              c=12.6093(2)  
                                alpha=90                      beta=90                      gamma=90  
Temperature:              293 K

|                | Calculated                                                               | Reported                                                                 |
|----------------|--------------------------------------------------------------------------|--------------------------------------------------------------------------|
| Volume         | 2004.81(10)                                                              | 2004.80(6)                                                               |
| Space group    | I a -3 d                                                                 | I a -3 d                                                                 |
| Hall group     | -I 4bd 2c 3                                                              | ?                                                                        |
| Moiety formula | Fe <sub>25.09</sub> O <sub>96</sub> Sb <sub>14.91</sub> ,<br>24(Ca)      | Fe <sub>25.09</sub> O <sub>96</sub> Sb <sub>14.91</sub> ,<br>24(Ca)      |
| Sum formula    | Ca <sub>24</sub> Fe <sub>25.09</sub> O <sub>96</sub> Sb <sub>14.91</sub> | Ca <sub>24</sub> Fe <sub>25.09</sub> O <sub>96</sub> Sb <sub>14.91</sub> |
| Mr             | 5714.77                                                                  | 5714.77                                                                  |
| Dx,g cm-3      | 4.734                                                                    | 4.734                                                                    |
| Z              | 1                                                                        | 1                                                                        |
| Mu (mm-1)      | 10.991                                                                   | 10.991                                                                   |
| F000           | 2660.8                                                                   | 2660.0                                                                   |
| F000'          | 2667.37                                                                  |                                                                          |
| h,k,lmax       | 21,21,21                                                                 | 20,20,20                                                                 |
| Nref           | 421                                                                      | 401                                                                      |
| Tmin,Tmax      | 0.244,0.489                                                              | 0.925,0.988                                                              |
| Tmin'          | 0.133                                                                    |                                                                          |

Correction method= # Reported T Limits: Tmin=0.925 Tmax=0.988  
AbsCorr = MULTI-SCAN

Data completeness= 0.952                      Theta(max)= 36.530

R(reflections)= 0.0197( 305)                      wR2(reflections)= 0.0613( 401)

S = 1.128                      Npar= 19

---

The following ALERTS were generated. Each ALERT has the format

**test-name\_ALERT\_alert-type\_alert-level.**

Click on the hyperlinks for more details of the test.

---

### Alert level C

|                   |      |      |              |       |         |       |              |
|-------------------|------|------|--------------|-------|---------|-------|--------------|
| PLAT741_ALERT_1_C | Bond | Calc | 3.15230(10), | Rep   | 3.15230 | ..... | Missing s.u. |
|                   | X    | -T   |              | 1.555 | 1.555   | ..... | # 9 Check    |
| PLAT741_ALERT_1_C | Bond | Calc | 3.15230(10), | Rep   | 3.15230 | ..... | Missing s.u. |
|                   | X    | -T   |              | 1.555 | 50.556  | ..... | # 10 Check   |
| PLAT741_ALERT_1_C | Bond | Calc | 3.15230(10), | Rep   | 3.15230 | ..... | Missing s.u. |
|                   | T    | -X   |              | 1.555 | 50.656  | ..... | # 28 Check   |

---

### Alert level G

|                   |                                                  |        |       |
|-------------------|--------------------------------------------------|--------|-------|
| PLAT004_ALERT_5_G | Polymeric Structure Found with Maximum Dimension | 1      | Info  |
| PLAT005_ALERT_5_G | No Embedded Refinement Details Found in the CIF  | Please | Do !  |
| PLAT017_ALERT_1_G | Check Scattering Type Consistency of             | Xas    | CA    |
| PLAT017_ALERT_1_G | Check Scattering Type Consistency of T           | as     | FE    |
| PLAT068_ALERT_1_G | Reported F000 Differs from Calcd (or Missing)... | Please | Check |
| PLAT083_ALERT_2_G | SHELXL Second Parameter in WGHT Unusually Large  | 5.76   | Why ? |
| PLAT152_ALERT_1_G | The Supplied and Calc. Volume s.u. Differ by ... | 4      | Units |
| PLAT199_ALERT_1_G | Reported _cell_measurement_temperature ..... (K) | 293    | Check |
| PLAT200_ALERT_1_G | Reported _diffn_ambient_temperature ..... (K)    | 293    | Check |
| PLAT301_ALERT_3_G | Main Residue Disorder .....(Resd 1 )             | 36%    | Note  |
| PLAT720_ALERT_4_G | Number of Unusual/Non-Standard Labels .....      | 4      | Note  |
| PLAT899_ALERT_4_G | SHELXL97 is Deprecated and Succeeded by SHELXL   | 2018   | Note  |

- 
- 0 **ALERT level A** = Most likely a serious problem - resolve or explain  
0 **ALERT level B** = A potentially serious problem, consider carefully  
3 **ALERT level C** = Check. Ensure it is not caused by an omission or oversight  
12 **ALERT level G** = General information/check it is not something unexpected
- 9 ALERT type 1 CIF construction/syntax error, inconsistent or missing data  
1 ALERT type 2 Indicator that the structure model may be wrong or deficient  
1 ALERT type 3 Indicator that the structure quality may be low  
2 ALERT type 4 Improvement, methodology, query or suggestion  
2 ALERT type 5 Informative message, check
- 

## Datablock: shelx

---

Bond precision: Fe- O = 0.0014 A      Wavelength=0.71073

Cell:                    a=12.6093(2)            b=12.6093(2)            c=12.6093(2)  
                          alpha=90                beta=90                gamma=90

Temperature:            293 K

|                | Calculated                     | Reported                       |
|----------------|--------------------------------|--------------------------------|
| Volume         | 2004.81(10)                    | 2004.80(6)                     |
| Space group    | I a -3 d                       | I a -3 d                       |
| Hall group     | -I 4bd 2c 3                    | ?                              |
| Moiety formula | Fe25.09 O96 Sb14.91,<br>24(Ca) | Fe25.09 O96 Sb14.91,<br>24(Ca) |
| Sum formula    | Ca24 Fe25.09 O96 Sb14.91       | Ca24 Fe25.09 O96 Sb14.91       |
| Mr             | 5714.77                        | 5714.77                        |
| Dx,g cm-3      | 4.734                          | 4.734                          |
| Z              | 1                              | 1                              |
| Mu (mm-1)      | 10.991                         | 10.991                         |
| F000           | 2660.8                         | 2660.0                         |
| F000'          | 2667.37                        |                                |
| h,k,lmax       | 21,21,21                       | 20,20,20                       |
| Nref           | 421                            | 401                            |
| Tmin,Tmax      |                                |                                |
| Tmin'          | 0.133                          |                                |

Correction method= Not given

Data completeness= 0.952                      Theta(max)= 36.530

R(reflections)= 0.0197( 305)                      wR2(reflections)= 0.0613( 401)

S = 1.128                                      Npar= 19

The following ALERTS were generated. Each ALERT has the format

**test-name\_ALERT\_alert-type\_alert-level.**

Click on the hyperlinks for more details of the test.

## Alert level A

SYMM001\_ALERT\_1\_A \_symmetry\_cell\_setting is missing

The cell setting should be one of the following

- \* triclinic
- \* monoclinic
- \* orthorhombic
- \* tetragonal
- \* rhombohedral
- \* trigonal
- \* hexagonal
- \* cubic

The following tests will not be performed.

SYMMS\_01,SYMMS\_02

EXPT005\_ALERT\_1\_A \_exptl\_crystal\_description is missing

Crystal habit description.

The following tests will not be performed.

CRYSR\_01

DIFF003\_ALERT\_1\_A \_diffrn\_measurement\_device\_type is missing

Diffractometer make and type. Replaces \_diffrn\_measurement\_type.

ATOM002\_ALERT\_1\_A \_atom\_site\_label is missing

Unique label identifying the atom site.

ATOM003\_ALERT\_1\_A \_atom\_site\_fract\_x is missing

Fractional coordinates of atom site.

ATOM004\_ALERT\_1\_A \_atom\_site\_fract\_y is missing  
Fractional coordinates of atom site.  
ATOM005\_ALERT\_1\_A \_atom\_site\_fract\_z is missing  
Fractional coordinates of atom site.  
TYPE100\_ALERT\_1\_A \_atom\_site\_label is not of type char.  
TYPE101\_ALERT\_1\_A \_atom\_site\_fract\_x is not of type numb.  
TYPE102\_ALERT\_1\_A \_atom\_site\_fract\_y is not of type numb.  
TYPE103\_ALERT\_1\_A \_atom\_site\_fract\_z is not of type numb.  
GEOM001\_ALERT\_1\_A \_geom\_bond\_atom\_site\_label\_1 is missing  
Label identifying the atom site 1.  
GEOM002\_ALERT\_1\_A \_geom\_bond\_atom\_site\_label\_2 is missing  
Label identifying the atom site 2.  
GEOM003\_ALERT\_1\_A \_geom\_bond\_distance is missing  
Distance between atom sites 1 and 2.

---

14 **ALERT level A** = Most likely a serious problem - resolve or explain  
0 **ALERT level B** = A potentially serious problem, consider carefully  
0 **ALERT level C** = Check. Ensure it is not caused by an omission or oversight  
0 **ALERT level G** = General information/check it is not something unexpected

14 **ALERT type 1** CIF construction/syntax error, inconsistent or missing data  
0 **ALERT type 2** Indicator that the structure model may be wrong or deficient  
0 **ALERT type 3** Indicator that the structure quality may be low  
0 **ALERT type 4** Improvement, methodology, query or suggestion  
0 **ALERT type 5** Informative message, check

---

It is advisable to attempt to resolve as many as possible of the alerts in all categories. Often the minor alerts point to easily fixed oversights, errors and omissions in your CIF or refinement strategy, so attention to these fine details can be worthwhile. In order to resolve some of the more serious problems it may be necessary to carry out additional measurements or structure refinements. However, the purpose of your study may justify the reported deviations and the more serious of these should normally be commented upon in the discussion or experimental section of a paper or in the "special\_details" fields of the CIF. checkCIF was carefully designed to identify outliers and unusual parameters, but every test has its limitations and alerts that are not important in a particular case may appear. Conversely, the absence of alerts does not guarantee there are no aspects of the results needing attention. It is up to the individual to critically assess their own results and, if necessary, seek expert advice.

### **Publication of your CIF in IUCr journals**

A basic structural check has been run on your CIF. These basic checks will be run on all CIFs submitted for publication in IUCr journals (*Acta Crystallographica*, *Journal of Applied Crystallography*, *Journal of Synchrotron Radiation*); however, if you intend to submit to *Acta Crystallographica Section C* or *E* or *IUCrData*, you should make sure that full publication checks are run on the final version of your CIF prior to submission.

### **Publication of your CIF in other journals**

Please refer to the *Notes for Authors* of the relevant journal for any special instructions relating to CIF submission.

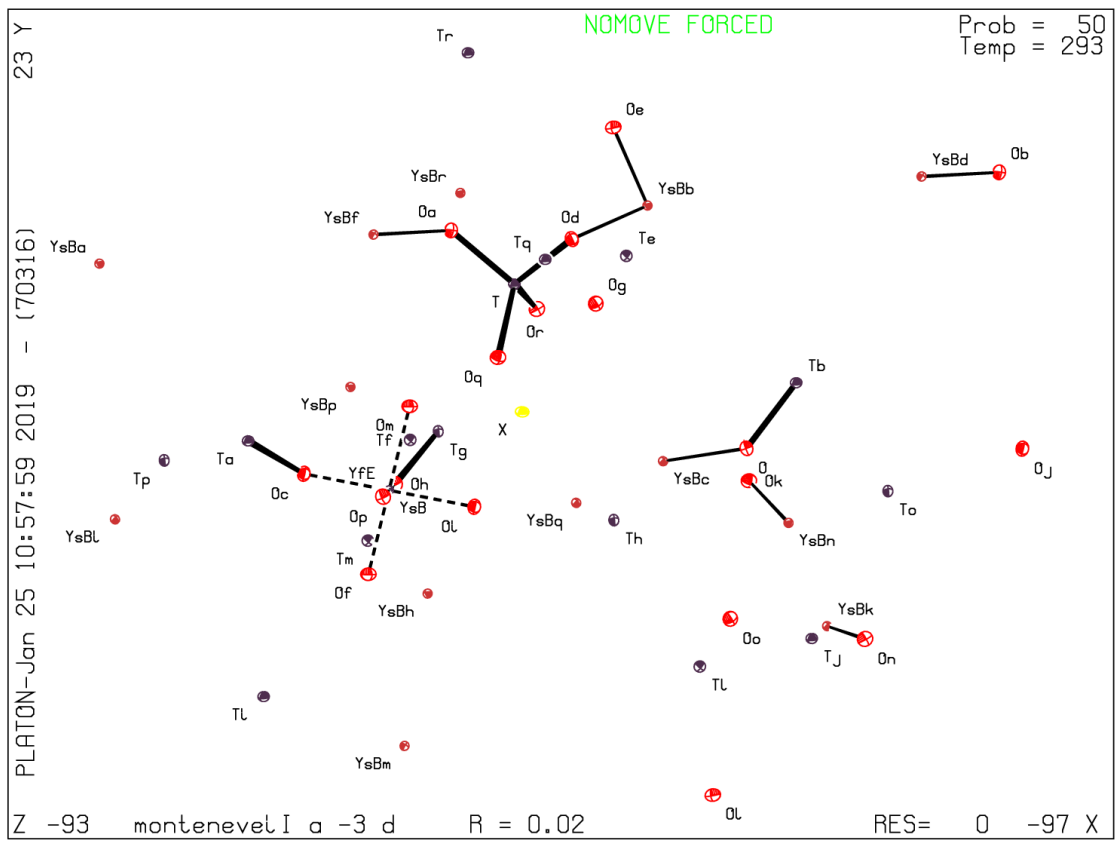

Supplement: Supplementary file 1 [file ejm-32-77-2020-supplement.zip]
