# Supplementary material for: Adding complexity to the garnet supergroup: monteneveite, Ca&lt;sub&gt;3&lt;/sub&gt;Sb&lt;sup&gt;5+&lt;/sup&gt;&lt;sub&gt;2&lt;/sub&gt;(Fe&lt;sup&gt;3+&lt;/sup&gt;&lt;sub&gt;2&lt;/sub&gt;Fe&lt;sup&gt;2+&lt;/sup&gt;)O&lt;sub&gt;12&lt;/sub&gt;, a new mineral from the Monteneve mine, Bolzano Province, Italy
Source: Copernicus journal article supplement (doi:10.5194/ejm-32-77-2020), 2020-01-21
Supplement: Supplementary file 2 [file ejm-32-77-2020-supplement.zip]

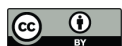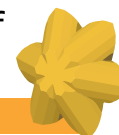

## *Supplement of*

# **Adding complexity to the garnet supergroup: monteneveite, $\text{Ca}_3\text{Sb}_2^{5+}(\text{Fe}_2^{3+}\text{Fe}^{2+})\text{O}_{12}$ , a new mineral from the Monteneve mine, Bolzano Province, Italy**

**Andreas Karlsson et al.**

*Correspondence to:* Andreas Karlsson ([andreas.karlsson@nrm.se](mailto:andreas.karlsson@nrm.se))

- [ejm-32-77-2020-supplement-title-page.pdf](#)
- [checkcif\\_monteneveite.pdf](#)
- [monteneveite.cif](#)

The copyright of individual parts of the supplement might differ from the CC BY 4.0 License.
